# Supplementary material for: Au NCs-enhanced chemiluminescence from NaHSO3–H2O2 and its analytical application
Source: Royal Society of Chemistry journal article supplement (doi:10.1039/c5ra24224j), 2016-01-01
Supplement: c5ra24224j1.pdf [file c5ra24224j1.pdf]

## Supporting information

### Au NCs-enhanced chemiluminescence from NaHSO<sub>3</sub>-H<sub>2</sub>O<sub>2</sub> and its analytical application

Yanyan He<sup>a</sup>, Yanyan Sui<sup>a</sup>, Shuangjiao Xu<sup>b</sup> and Funan Chen<sup>a,\*</sup>

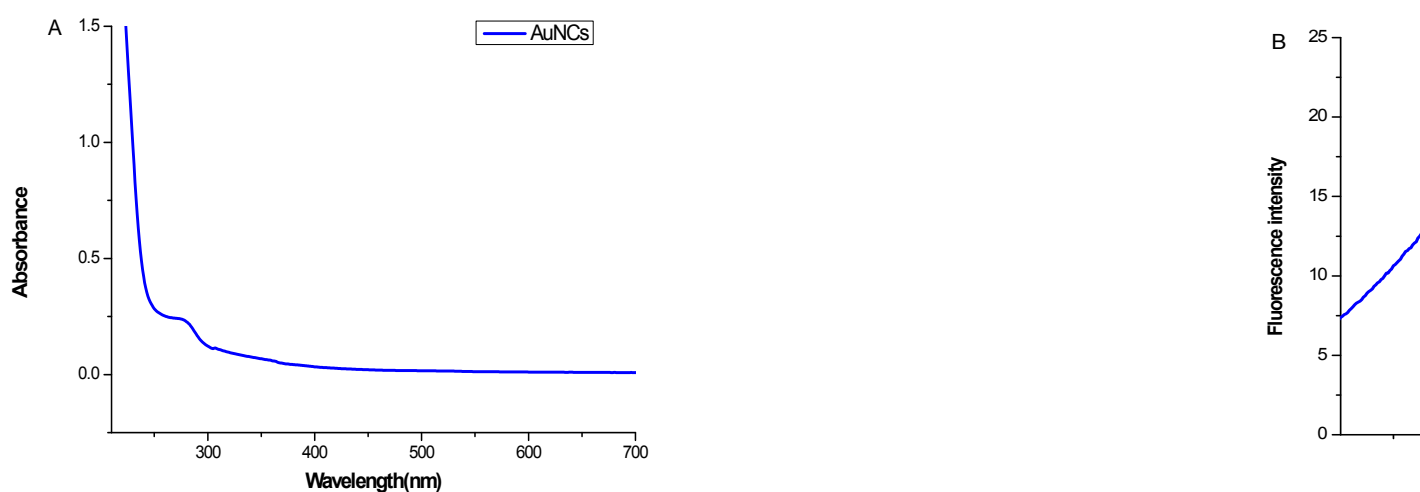

**Fig.S1.** A. UV-vis absorption spectra of BSA-protected gold nanoclusters. B. photoemission ( $\lambda_{\text{ex}}=470$  nm) spectra of aqueous solution of BSA-Au NCs.

**Table S1** The reproducibility of this method

| $\Delta I$ | Trypsin (ug/ml) |
|------------|-----------------|
| 5424       | 44.47719689     |

|      |             |
|------|-------------|
| 5707 | 49.72376715 |
| 5493 | 45.75639600 |
| 5313 | 42.41935484 |
| 5457 | 45.08898776 |
| 5393 | 43.90248424 |
| 5337 | 42.86429366 |
| 5655 | 48.75973304 |
| 5691 | 49.42714127 |
| 5443 | 44.82944012 |
| RSD  | 2.7%        |

**Table S2** The stability of this method

|                 | $\Delta I$ | Trypsin (ug/mL) | Average(ug/mL) |
|-----------------|------------|-----------------|----------------|
| The first day   | 5494       | 45.77493511     | 44.78000247    |
|                 | 5410       | 44.21764924     |                |
|                 | 5417       | 44.34742306     |                |
| The second day  | 5483       | 45.57100482     | 46.53503893    |
|                 | 5611       | 47.94401187     |                |
|                 | 5511       | 46.09010011     |                |
| The third day   | 5453       | 45.01483129     | 45.97886541    |
|                 | 5544       | 46.70189099     |                |
|                 | 5518       | 46.21987393     |                |
| The fourth day  | 5523       | 46.31256952     | 45.74403658    |
|                 | 5431       | 44.60697071     |                |
|                 | 5523       | 46.31256952     |                |
| The fifth day   | 5432       | 44.62550983     | 44.6681498     |
|                 | 5436       | 44.6996663      |                |
|                 | 5601       | 47.75862069     |                |
| The sixth day   | 5373       | 43.53170189     | 45.441231      |
|                 | 5487       | 45.64516129     |                |
|                 | 5568       | 47.14682981     |                |
| The seventh day | 5498       | 45.84909158     | 44.61933012    |
|                 | 5433       | 44.64404894     |                |
|                 | 5364       | 43.36484983     |                |

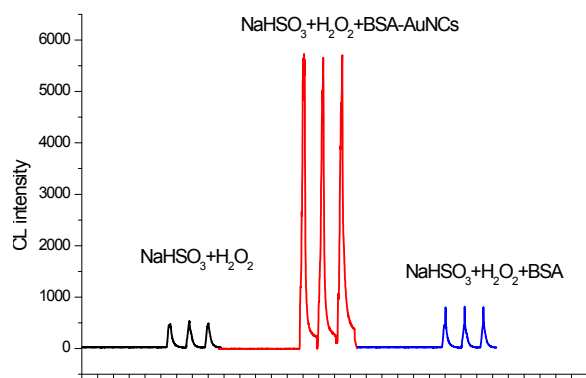

**Fig.S2.** Kinetic curves of CL systems: NaHSO<sub>3</sub>-H<sub>2</sub>O<sub>2</sub> (black line); NaHSO<sub>3</sub>-H<sub>2</sub>O<sub>2</sub>-Au NCs (red line); NaHSO<sub>3</sub>-H<sub>2</sub>O<sub>2</sub>-BSA (blue line).
